# Supplementary material
Source: publisher site journal article supplement (https://www.dovepress.com/article/336225)
Supplement: Supplementary file 1 [file get_supplementary_file.php]

Table S1 Differential analysis of 138 gene expression profiles in high- and low-HOXD10 expression groups

| gene_id         | baseMean    | log2FoldChange | lfcSE       | stat         | pvalue      | padj        | gene_name |
|-----------------|-------------|----------------|-------------|--------------|-------------|-------------|-----------|
| ENSG00000183090 | 91.80189317 | -2.252226503   | 0.452313159 | -4.97935216  | 6.38E-07    | 0.000423772 | FREM3     |
| ENSG00000198028 | 62.57640964 | -1.886907802   | 0.383842699 | -4.91583612  | 8.84E-07    | 0.000510209 | ZNF560    |
| ENSG00000124875 | 105.4122709 | -1.85099547    | 0.415522718 | -4.454619184 | 8.40E-06    | 0.00314756  | CXCL6     |
| ENSG00000125813 | 25.4807242  | -1.777512845   | 0.41650434  | -4.267693448 | 1.98E-05    | 0.005533166 | PAX1      |
| ENSG00000275385 | 133.1427598 | -1.700406658   | 0.389942275 | -4.360662504 | 1.30E-05    | 0.004306609 | CCL18     |
| ENSG00000105989 | 55.09176323 | -1.695884687   | 0.32953519  | -5.146293142 | 2.66E-07    | 0.000228132 | WNT2      |
| ENSG00000178919 | 2.596656921 | -1.685677559   | 0.481059274 | -3.504095336 | 0.000458161 | 0.035907969 | FOXE1     |
| ENSG00000148704 | 36.95544872 | -1.657954733   | 0.355447528 | -4.664414862 | 3.09E-06    | 0.001452776 | VAX1      |
| ENSG00000183032 | 10.95386445 | -1.615972184   | 0.338434511 | -4.774844567 | 1.80E-06    | 0.0009311   | SLC25A21  |
| ENSG00000204764 | 41.46130484 | -1.600624952   | 0.247070243 | -6.478420598 | 9.27E-11    | 3.26E-07    | RANBP17   |
| ENSG00000276547 | 108.3796243 | -1.566644069   | 0.246755233 | -6.348980127 | 2.17E-10    | 6.94E-07    | PCDHGB5   |
| ENSG00000262406 | 31.74954675 | -1.521085473   | 0.401385994 | -3.789582837 | 0.0001509   | 0.019010834 | MMP12     |
| ENSG00000112232 | 27.48770002 | -1.504589185   | 0.281346825 | -5.347809371 | 8.90E-08    | 0.000108073 | KHDRBS2   |
| ENSG00000198354 | 5.327996846 | -1.475243236   | 0.392051658 | -3.762879722 | 0.000167968 | 0.020113311 | DCAF12L2  |
| ENSG00000147655 | 175.8189331 | -1.47101673    | 0.280479115 | -5.244656921 | 1.57E-07    | 0.000162123 | RSPO2     |
| ENSG00000105825 | 190.5446189 | -1.406058018   | 0.305657311 | -4.600112495 | 4.22E-06    | 0.001905867 | TFPI2     |
| ENSG00000123838 | 12.63404429 | -1.38456744    | 0.360228384 | -3.8435823   | 0.000121251 | 0.016939097 | C4BPA     |
| ENSG00000107984 | 370.6554381 | -1.33377815    | 0.386570812 | -3.450281577 | 0.000560002 | 0.038059604 | DKK1      |
| ENSG00000125726 | 57.41533986 | -1.308568193   | 0.294594776 | -4.441925997 | 8.92E-06    | 0.003269563 | CD70      |
| ENSG00000019169 | 343.4138351 | -1.299905434   | 0.35364696  | -3.675714996 | 0.000237184 | 0.024464922 | MARCO     |
| ENSG00000166926 | 4.686563268 | -1.235644199   | 0.325499456 | -3.796148273 | 0.000146962 | 0.01881376  | MS4A6E    |
| ENSG00000134160 | 3.936778072 | -1.16595626    | 0.261373373 | -4.460883858 | 8.16E-06    | 0.003115894 | TRPM1     |
| ENSG00000162897 | 4.027003872 | -1.12978469    | 0.318655487 | -3.54547383  | 0.000391908 | 0.033145834 | FCAMR     |
| ENSG00000115009 | 129.9466138 | -1.114856928   | 0.334410204 | -3.333800564 | 0.000856681 | 0.047872127 | CCL20     |
| ENSG00000163739 | 158.985967  | -1.114502583   | 0.281445019 | -3.959930033 | 7.50E-05    | 0.012689325 | CXCL1     |
| ENSG00000145824 | 4568.53479  | -1.110332118   | 0.281614519 | -3.942737478 | 8.06E-05    | 0.01325235  | CXCL14    |
| ENSG00000148677 | 16.33083931 | -1.068341453   | 0.277065043 | -3.855922931 | 0.000115294 | 0.016567015 | ANKRD1    |
| ENSG00000157766 | 457.4753697 | -1.062467436   | 0.305942199 | -3.472771779 | 0.000515113 | 0.037186146 | ACAN      |
| ENSG00000004939 | 10.65201387 | -1.02531477    | 0.263403203 | -3.89256758  | 9.92E-05    | 0.015353879 | SLC4A1    |
| ENSG00000158578 | 27.70170205 | -1.021258465   | 0.264114771 | -3.866722258 | 0.000110308 | 0.016180795 | ALAS2     |
| ENSG00000213934 | 2.065993018 | -1.012793307   | 0.277818733 | -3.645518416 | 0.000266853 | 0.026096029 | HBG1      |
| ENSG00000120093 | 766.4275646 | 1.00704071     | 0.271973539 | 3.702715769  | 0.000213304 | 0.023208207 | HOXB3     |
| ENSG00000104055 | 124.665326  | 1.007906084    | 0.282493189 | 3.567895172  | 0.00035986  | 0.031576978 | TGM5      |
| ENSG00000175879 | 315.5460611 | 1.008896481    | 0.273413553 | 3.690001715  | 0.000224253 | 0.023842465 | HOXD8     |
| ENSG00000106258 | 122.4938244 | 1.017594423    | 0.201713288 | 5.044756512  | 4.54E-07    | 0.000368372 | CYP3A5    |
| ENSG00000156150 | 32.06834144 | 1.018359513    | 0.273311771 | 3.725999466  | 0.000194543 | 0.022022122 | ALX3      |

|                 |             |             |             |             |             |             |            |
|-----------------|-------------|-------------|-------------|-------------|-------------|-------------|------------|
| ENSG00000104415 | 741.8591815 | 1.023036733 | 0.291282075 | 3.512185679 | 0.000444437 | 0.035403223 | WISP1      |
| ENSG00000182600 | 439.0958497 | 1.05098805  | 0.242680949 | 4.330739817 | 1.49E-05    | 0.004713321 | C2orf82    |
| ENSG00000118004 | 99.62207921 | 1.057106887 | 0.255899712 | 4.130942082 | 3.61E-05    | 0.008271531 | COLEC11    |
| ENSG00000149451 | 879.6145724 | 1.057222472 | 0.234358568 | 4.511132162 | 6.45E-06    | 0.002643638 | ADAM33     |
| ENSG00000124749 | 213.7303368 | 1.068754097 | 0.309508437 | 3.453069353 | 0.000554246 | 0.038025313 | COL21A1    |
| ENSG00000143107 | 45.00127495 | 1.094059222 | 0.259157609 | 4.221597913 | 2.43E-05    | 0.006373065 | FNDC7      |
| ENSG00000109705 | 69.39194301 | 1.095320859 | 0.240743396 | 4.549744156 | 5.37E-06    | 0.002278195 | NKX3-2     |
| ENSG00000181778 | 7.685112199 | 1.105688558 | 0.276320714 | 4.00146823  | 6.30E-05    | 0.011482785 | TMEM252    |
| ENSG00000116690 | 40.91733347 | 1.107279531 | 0.273768445 | 4.044584216 | 5.24E-05    | 0.010445935 | PRG4       |
| ENSG00000125740 | 1039.462721 | 1.108248767 | 0.309079665 | 3.585641155 | 0.000336251 | 0.030403148 | FOSB       |
| ENSG00000205856 | 2.691050644 | 1.112443751 | 0.328593809 | 3.385467769 | 0.000710571 | 0.043657305 | C22orf42   |
| ENSG00000163273 | 35.10867915 | 1.113965439 | 0.280221324 | 3.975305743 | 7.03E-05    | 0.012130003 | NPPC       |
| ENSG00000135454 | 1865.74903  | 1.12101748  | 0.215359769 | 5.205324486 | 1.94E-07    | 0.000184263 | B4GALNT1   |
| ENSG00000137699 | 90.63584023 | 1.132654604 | 0.294980968 | 3.839754861 | 0.000123157 | 0.016989729 | TRIM29     |
| ENSG00000002745 | 97.47811301 | 1.136037372 | 0.337389231 | 3.367141772 | 0.000759516 | 0.044939112 | WNT16      |
| ENSG00000278500 | 12.69319932 | 1.138695582 | 0.28472654  | 3.999260424 | 6.35E-05    | 0.011530678 | AC009336.2 |
| ENSG00000034239 | 91.91069623 | 1.138746804 | 0.340545051 | 3.343894739 | 0.000826111 | 0.047090573 | EFCAB1     |
| ENSG00000174279 | 20.64925828 | 1.145344997 | 0.243656606 | 4.700652351 | 2.59E-06    | 0.001250654 | EVX2       |
| ENSG00000178602 | 147.7486883 | 1.14634072  | 0.30787311  | 3.723419431 | 0.000196543 | 0.022106333 | OTOS       |
| ENSG00000127129 | 9.279095624 | 1.147377076 | 0.320023638 | 3.585288517 | 0.000336706 | 0.030403148 | EDN2       |
| ENSG00000180176 | 7.069647177 | 1.14957918  | 0.306913689 | 3.745610646 | 0.000179956 | 0.020771586 | TH         |
| ENSG00000167858 | 297.4080181 | 1.154265536 | 0.316411544 | 3.647988066 | 0.000264302 | 0.02591852  | TEKT1      |
| ENSG00000132434 | 11021.65791 | 1.156392975 | 0.272994401 | 4.235958582 | 2.28E-05    | 0.006163007 | LANCL2     |
| ENSG00000164099 | 318.649186  | 1.164087666 | 0.250368541 | 4.649496536 | 3.33E-06    | 0.00154136  | PRSS12     |
| ENSG00000164879 | 2265.993944 | 1.178352339 | 0.323760925 | 3.639575533 | 0.000273088 | 0.026485005 | CA3        |
| ENSG00000053438 | 3929.236675 | 1.186084205 | 0.35149227  | 3.374424718 | 0.000739701 | 0.04450751  | NNAT       |
| ENSG00000143171 | 149.4120836 | 1.189384938 | 0.267486555 | 4.446522322 | 8.73E-06    | 0.003234102 | RXRG       |
| ENSG00000091704 | 5.270158258 | 1.196117104 | 0.327638334 | 3.65072392  | 0.000261502 | 0.025805001 | CPA1       |
| ENSG00000164778 | 247.781438  | 1.199368345 | 0.207915656 | 5.768533111 | 8.00E-09    | 1.56E-05    | EN2        |
| ENSG00000135447 | 382.3877435 | 1.209894257 | 0.296093075 | 4.086195725 | 4.39E-05    | 0.009484279 | PPP1R1A    |
| ENSG00000107187 | 11.53954944 | 1.212947601 | 0.362588509 | 3.345245566 | 0.000822097 | 0.047060068 | LHX3       |
| ENSG00000124159 | 45.21851175 | 1.233876963 | 0.280762795 | 4.394731011 | 1.11E-05    | 0.003845161 | MATN4      |
| ENSG00000108001 | 78.45629567 | 1.237857063 | 0.307463448 | 4.02602999  | 5.67E-05    | 0.010972829 | EBF3       |
| ENSG00000175356 | 1706.673613 | 1.25214204  | 0.237781286 | 5.265940238 | 1.39E-07    | 0.000153443 | SCUBE2     |
| ENSG00000166426 | 151.464542  | 1.253899939 | 0.361359194 | 3.469954439 | 0.000520547 | 0.037247652 | CRABP1     |
| ENSG00000175189 | 18.89923499 | 1.254707939 | 0.287932527 | 4.357645696 | 1.31E-05    | 0.004325575 | INHBC      |
| ENSG00000111012 | 331.1003687 | 1.271481074 | 0.30626485  | 4.151573629 | 3.30E-05    | 0.00785445  | CYP27B1    |
| ENSG00000136698 | 2.091394684 | 1.286221322 | 0.371409872 | 3.46307791  | 0.000534034 | 0.037736753 | CFC1       |

|                 |             |             |             |             |             |             |           |
|-----------------|-------------|-------------|-------------|-------------|-------------|-------------|-----------|
| ENSG00000102239 | 3.565828281 | 1.317597072 | 0.337404759 | 3.905093327 | 9.42E-05    | 0.014936598 | BRS3      |
| ENSG00000123388 | 127.3186921 | 1.318928758 | 0.31687319  | 4.1623236   | 3.15E-05    | 0.007544539 | HOXC11    |
| ENSG00000144891 | 56.79639638 | 1.335151182 | 0.267813402 | 4.98537853  | 6.18E-07    | 0.000423772 | AGTR1     |
| ENSG00000181378 | 77.57481361 | 1.336345199 | 0.325244682 | 4.10873805  | 3.98E-05    | 0.008963297 | CFAP65    |
| ENSG00000183671 | 86.48383546 | 1.338045214 | 0.283333655 | 4.722507164 | 2.33E-06    | 0.001139052 | GPR1      |
| ENSG00000101958 | 116.9315406 | 1.3414458   | 0.308748812 | 4.34478044  | 1.39E-05    | 0.00450285  | GLRA2     |
| ENSG00000136574 | 98.41904552 | 1.345352185 | 0.376772056 | 3.570732393 | 0.000355984 | 0.031488524 | GATA4     |
| ENSG00000135903 | 145.497577  | 1.346015635 | 0.321851843 | 4.18209703  | 2.89E-05    | 0.007118132 | PAX3      |
| ENSG00000174898 | 6.485326656 | 1.348123686 | 0.306826837 | 4.393760663 | 1.11E-05    | 0.003845161 | CATSPERD  |
| ENSG00000172236 | 25.21746871 | 1.363821274 | 0.366124369 | 3.725021851 | 0.000195298 | 0.022036785 | TPSAB1    |
| ENSG00000123364 | 135.6878592 | 1.3656242   | 0.351247051 | 3.887930715 | 0.000101102 | 0.015353879 | HOXC13    |
| ENSG00000187889 | 10.20168572 | 1.377009318 | 0.297462695 | 4.629183218 | 3.67E-06    | 0.001678459 | FYB2      |
| ENSG00000163081 | 9.37716044  | 1.390589748 | 0.377519255 | 3.683493566 | 0.000230059 | 0.023962053 | CCDC140   |
| ENSG00000006377 | 109.9108332 | 1.398469697 | 0.373293187 | 3.746303828 | 0.000179459 | 0.020771586 | DLX6      |
| ENSG00000177551 | 58.64552537 | 1.399069604 | 0.30563642  | 4.577561806 | 4.70E-06    | 0.002044614 | NHLH2     |
| ENSG00000077274 | 57.2714846  | 1.408437847 | 0.349832674 | 4.026032878 | 5.67E-05    | 0.010972829 | CAPN6     |
| ENSG00000103546 | 5.981562171 | 1.41363694  | 0.382802757 | 3.692859871 | 0.000221746 | 0.023800536 | SLC6A2    |
| ENSG00000074771 | 4.6646401   | 1.43987279  | 0.368489998 | 3.907494903 | 9.33E-05    | 0.014923401 | NOX3      |
| ENSG00000188620 | 1.274670888 | 1.44134736  | 0.419273519 | 3.437725721 | 0.000586622 | 0.039267169 | HMX3      |
| ENSG00000141744 | 76.74737636 | 1.450107254 | 0.301997411 | 4.801720821 | 1.57E-06    | 0.000852004 | PNMT      |
| ENSG00000091583 | 10.8604485  | 1.456941778 | 0.378853282 | 3.845662282 | 0.000120227 | 0.016911959 | APOH      |
| ENSG00000131864 | 1.56510599  | 1.486251972 | 0.434815915 | 3.418117692 | 0.000630558 | 0.040960848 | USP29     |
| ENSG00000112238 | 37.16736171 | 1.492811698 | 0.432212947 | 3.4538801   | 0.000552583 | 0.038025313 | PRDM13    |
| ENSG00000102287 | 256.6587514 | 1.509374372 | 0.271740014 | 5.554479619 | 2.78E-08    | 4.08E-05    | GABRE     |
| ENSG00000170178 | 12.64566751 | 1.532233392 | 0.271483935 | 5.643919197 | 1.66E-08    | 2.66E-05    | HOXD12    |
| ENSG00000184344 | 1.912967651 | 1.532720265 | 0.403994126 | 3.793917206 | 0.000148289 | 0.018846639 | GDF3      |
| ENSG00000171786 | 213.753107  | 1.534472073 | 0.292501717 | 5.24602757  | 1.55E-07    | 0.000162123 | NHLH1     |
| ENSG00000171551 | 51.35799877 | 1.560690243 | 0.313147458 | 4.983882837 | 6.23E-07    | 0.000423772 | ECEL1     |
| ENSG00000007350 | 198.4200365 | 1.563363332 | 0.30107869  | 5.192540637 | 2.07E-07    | 0.000186429 | TKTL1     |
| ENSG00000075891 | 21.74776142 | 1.564149531 | 0.374031951 | 4.181860742 | 2.89E-05    | 0.007118132 | PAX2      |
| ENSG00000120075 | 51.19300447 | 1.567023943 | 0.378489409 | 4.140205532 | 3.47E-05    | 0.008090034 | HOXB5     |
| ENSG00000184601 | 6.026372359 | 1.568992591 | 0.318175207 | 4.931222026 | 8.17E-07    | 0.000479473 | C14orf180 |
| ENSG00000186081 | 67.38182056 | 1.569831445 | 0.364381939 | 4.308203221 | 1.65E-05    | 0.004995047 | KRT5      |
| ENSG00000133115 | 26.55813559 | 1.574950099 | 0.473798878 | 3.32408997  | 0.000887076 | 0.049025904 | STOML3    |
| ENSG00000135346 | 2.148306898 | 1.575877954 | 0.440065802 | 3.581005269 | 0.000342275 | 0.030512836 | CGA       |
| ENSG00000205221 | 37.58815396 | 1.595079747 | 0.29116838  | 5.478203867 | 4.30E-08    | 5.82E-05    | VIT       |
| ENSG00000164093 | 79.9879619  | 1.652901356 | 0.450596977 | 3.668247772 | 0.000244218 | 0.024777265 | PITX2     |
| ENSG00000165409 | 153.8044551 | 1.662750084 | 0.3328133   | 4.996044584 | 5.85E-07    | 0.000423772 | TSHR      |

|                 |             |             |             |             |             |             |            |
|-----------------|-------------|-------------|-------------|-------------|-------------|-------------|------------|
| ENSG00000078399 | 98.92018258 | 1.663058441 | 0.332632683 | 4.999684412 | 5.74E-07    | 0.000423772 | HOXA9      |
| ENSG00000128709 | 262.5350153 | 1.677715226 | 0.233334455 | 7.190173547 | 6.47E-13    | 4.56E-09    | HOXD9      |
| ENSG00000186471 | 25.28651104 | 1.684661963 | 0.344758712 | 4.886495695 | 1.03E-06    | 0.00058285  | AKAP14     |
| ENSG00000182329 | 36.7867086  | 1.686021483 | 0.251290569 | 6.709449895 | 1.95E-11    | 9.83E-08    | KIAA2012   |
| ENSG00000174450 | 3.858757342 | 1.691208449 | 0.407991246 | 4.14520769  | 3.40E-05    | 0.007968202 | GOLGA6L2   |
| ENSG00000186439 | 46.74984483 | 1.717853112 | 0.385248201 | 4.459081461 | 8.23E-06    | 0.003115894 | TRDN       |
| ENSG00000146910 | 171.1400437 | 1.74897905  | 0.286065719 | 6.113906477 | 9.72E-10    | 2.63E-06    | CNPY1      |
| ENSG00000008196 | 49.4933095  | 1.755119932 | 0.353869151 | 4.959799203 | 7.06E-07    | 0.000443621 | TFAP2B     |
| ENSG00000197253 | 23.22974461 | 1.759517957 | 0.323427527 | 5.44022326  | 5.32E-08    | 6.69E-05    | TPSB2      |
| ENSG00000125879 | 5.790756107 | 1.759621459 | 0.521980017 | 3.371051382 | 0.000748819 | 0.044704275 | OTOR       |
| ENSG00000182533 | 7.299712204 | 1.812161693 | 0.30572502  | 5.92742359  | 3.08E-09    | 7.74E-06    | CAV3       |
| ENSG00000184811 | 7.709331218 | 1.819755636 | 0.334397731 | 5.441889901 | 5.27E-08    | 6.69E-05    | TUSC5      |
| ENSG00000091181 | 11.39580384 | 1.828773837 | 0.36919084  | 4.953464814 | 7.29E-07    | 0.000450275 | IL5RA      |
| ENSG00000159184 | 166.7973003 | 1.908069891 | 0.386638278 | 4.935025832 | 8.01E-07    | 0.000478664 | HOXB13     |
| ENSG00000128714 | 303.4893621 | 1.913869452 | 0.303843203 | 6.298872024 | 3.00E-10    | 8.80E-07    | HOXD13     |
| ENSG00000152611 | 23.93081971 | 1.923290092 | 0.430285538 | 4.469799526 | 7.83E-06    | 0.003028905 | CAPSL      |
| ENSG00000180264 | 37.98506188 | 1.934146553 | 0.337368849 | 5.733032433 | 9.87E-09    | 1.74E-05    | ADGRD2     |
| ENSG00000184895 | 12.84869273 | 1.998401815 | 0.473337579 | 4.221937793 | 2.42E-05    | 0.006373065 | SRY        |
| ENSG00000138083 | 26.25280589 | 2.026930829 | 0.344193576 | 5.888926954 | 3.89E-09    | 8.55E-06    | SIX3       |
| ENSG00000128713 | 153.9966132 | 2.224408927 | 0.225584419 | 9.860649683 | 6.16E-23    | 1.09E-18    | HOXD11     |
| ENSG00000135443 | 1.083877781 | 2.244204615 | 0.646397972 | 3.471862094 | 0.000516862 | 0.037186146 | KRT85      |
| ENSG00000179813 | 16.55876312 | 2.335641152 | 0.512064361 | 4.561225756 | 5.09E-06    | 0.002183391 | FAM216B    |
| ENSG00000270168 | 18.71526377 | 2.362964348 | 0.474111114 | 4.983988515 | 6.23E-07    | 0.000423772 | AC004233.2 |
| ENSG00000170498 | 13.70175856 | 2.515123683 | 0.428627292 | 5.867857067 | 4.41E-09    | 9.14E-06    | KISS1      |
| ENSG00000128710 | 327.7999431 | 2.515469071 | 0.210689911 | 11.93920041 | 7.39E-33    | 2.60E-28    | HOXD10     |
| ENSG00000120068 | 92.17890663 | 3.171617394 | 0.408147703 | 7.770758901 | 7.80E-15    | 6.87E-11    | HOXB8      |
